# Supplementary material
Source: PubMed Central journal article supplement (PMC9214897)
Supplement: sj-pdf-1-sph-10.1177_19417381211037966.pdf [file sj-pdf-1-sph-10.1177_19417381211037966.pdf]

| Author/Year     |   | Excercise Description                         | Multi-Planar | Saggittal ( S ) | Frontal ( F ) | Transverse ( T ) | Bilateral Weight Bearing | Single Limb Stance | Non-Weight Bearing | Trunk & Hip Dissoc. Control | Flight Phase | Totals |
|-----------------|---|-----------------------------------------------|--------------|-----------------|---------------|------------------|--------------------------|--------------------|--------------------|-----------------------------|--------------|--------|
| Barber-Foss     | 1 | Lateral jump and hold                         |              |                 | x             |                  |                          | x                  |                    |                             | x            | 3      |
| 2018            | 1 | Step hold                                     |              | x               |               |                  |                          | x                  |                    |                             |              | 2      |
|                 | 1 | BOSU (round) swimmers                         |              | x               |               |                  |                          |                    | x                  |                             |              | 2      |
|                 | 1 | BOSU (round) double knee hold                 |              | x               |               |                  |                          |                    | x                  |                             |              | 2      |
|                 | 1 | Single-legged lateral AIREX hop hold          | x            | x               | x             |                  |                          | x                  |                    | x                           | x            | 5      |
|                 | 1 | Bilateral tuck jump with soft landing         |              | x               |               |                  | x                        |                    |                    |                             | x            | 3      |
|                 | 1 | Front lunges                                  |              | x               |               |                  | x                        |                    |                    |                             |              | 2      |
|                 | 1 | Lunge jumps                                   |              | x               |               |                  | x                        |                    |                    |                             | x            | 3      |
|                 | 1 | BOSU (flat) double legged pelvic bridges      |              | x               |               |                  |                          |                    | x                  |                             |              | 2      |
|                 | 1 | Single-legged 90 degree hop hold              | x            | x               |               | x                |                          | x                  |                    |                             | x            | 4      |
|                 | 1 | BOSU (round) lateral crunch                   |              |                 | x             |                  |                          |                    | x                  |                             |              | 2      |
|                 | 1 | Swiss ball back hyperextensions               |              | x               |               |                  |                          |                    | x                  |                             |              | 2      |
|                 | 1 | Single-legged Romanian deadlift               |              | x               |               |                  |                          | x                  |                    | x                           |              | 3      |
|                 | 1 | Unanticipated hop to stabilization (level 1)* | x            | x               | x             |                  |                          | x                  |                    |                             | x            | 4      |
|                 | 1 | Hop to stabilization and reach (level 1)      | x            | x               | x             |                  |                          | x                  |                    |                             | x            | 4      |
| 15              |   |                                               |              |                 |               |                  |                          |                    |                    |                             |              |        |
|                 |   |                                               |              |                 |               |                  |                          |                    |                    |                             |              |        |
| Bee-Oh          | 1 | Jog to line                                   |              | x               |               |                  |                          | x                  |                    |                             | x            | 3      |
| 2009            | 1 | Shuttle run (side to side)                    | x            |                 | x             | x                |                          | x                  |                    |                             | x            | 4      |
| <i>Lim 2009</i> | 1 | Backward running                              |              | x               |               |                  |                          | x                  |                    |                             | x            | 3      |
|                 | 1 | Calf stretch*                                 |              | x               |               |                  | x                        |                    |                    |                             |              | 2      |
|                 | 1 | Quadriceps stretch*                           |              | x               |               |                  |                          |                    | x                  |                             |              | 2      |
|                 | 1 | Hamstring stretch*                            |              | x               |               |                  |                          |                    | x                  |                             |              | 2      |
|                 | 1 | Inner thigh stretch*                          |              |                 | x             |                  |                          |                    | x                  |                             |              | 2      |
|                 | 1 | Hip flexor stretch*                           |              | x               |               |                  |                          |                    | x                  |                             |              | 2      |
|                 | 1 | Walking lunges                                |              | x               |               |                  | x                        |                    |                    |                             |              | 2      |
|                 | 1 | Russian hamstring                             |              | x               |               |                  |                          |                    | x                  |                             |              | 2      |
|                 | 1 | Single toe raises                             |              | x               |               |                  |                          | x                  |                    |                             |              | 2      |
|                 | 1 | Lateral hops over a cone                      |              |                 | x             |                  | x                        |                    |                    |                             | x            | 3      |
|                 | 1 | Forward/backward hops over cone               |              | x               |               |                  | x                        |                    |                    |                             | x            | 3      |
|                 | 1 | Single-leg hops over cone*                    |              | x               |               |                  |                          | x                  |                    |                             | x            | 3      |
|                 | 1 | Vertical jumps with headers                   |              | x               |               |                  | x                        |                    |                    | x                           | x            | 4      |
|                 | 1 | Scissors jump                                 |              | x               |               |                  | x                        |                    |                    |                             | x            | 3      |
|                 | 1 | Shuttle run with forward/backward running     | x            | x               |               | x                |                          | x                  |                    |                             | x            | 4      |
|                 | 1 | Diagonal runs                                 | x            | x               | x             |                  |                          | x                  |                    |                             | x            | 4      |
|                 | 1 | Bounding runs                                 |              | x               |               |                  |                          | x                  |                    |                             | x            | 3      |
|                 | 1 | Bridiging with alternating hip flexion        |              | x               |               |                  |                          |                    | x                  |                             |              | 2      |



|                              |   |                                              |   |   |   |   |   |   |   |   |   |   |
|------------------------------|---|----------------------------------------------|---|---|---|---|---|---|---|---|---|---|
| Chena (11+)                  | 1 | Running straight ahead                       |   |   | x |   |   |   | x |   | x | 3 |
| 2019                         | 1 | Running hip out                              | x | x |   | x |   |   | x |   | x | 5 |
| <i>Brito 2010</i>            | 1 | Running hip in                               | x | x |   | x |   |   | x |   | x | 5 |
| <i>Longo 2012</i>            | 1 | Running circling partner                     |   | x |   |   |   |   | x |   | x | 3 |
| <i>Oliano 2017</i>           | 1 | Running shoulder contact                     | x | x | x |   |   |   | x |   | x | 5 |
| <i>Thompson 2017</i>         | 1 | Running quick forwards/backwards             |   | x |   |   |   |   | x |   | x | 3 |
| <i>Grooms 2013</i>           | 1 | The bench static                             |   | x |   |   |   |   |   | x |   | 2 |
| <i>Daneshjoo 2013</i>        | 1 | Sideways bench static                        |   |   |   | x |   |   |   | x |   | 2 |
| <i>Silvers-Granelli 2017</i> | 1 | Hamstrings beginner                          |   | x |   |   |   |   |   | x |   | 2 |
|                              | 1 | Single leg stance hold the ball              |   |   |   | x |   |   | x |   |   | 2 |
|                              | 1 | Squats with toe raises                       |   | x |   |   |   | x |   |   |   | 2 |
|                              | 1 | Jumping vertical jumps                       |   | x |   |   |   | x |   |   | x | 3 |
|                              | 1 | The bench alternate legs                     |   | x |   |   |   |   |   | x |   | 2 |
|                              | 1 | Sideways bench raise and lower hip           |   |   |   | x |   |   |   | x |   | 2 |
|                              | 1 | Hamstring intermediate                       |   | x |   |   |   |   |   | x |   | 2 |
|                              | 1 | Single leg stance throwing ball with partner |   |   |   | x |   |   | x |   | x | 3 |
|                              | 1 | Squats walking lunges                        |   | x |   |   |   | x |   |   |   | 2 |
|                              | 1 | Jumping lateral jumps                        |   |   |   | x |   |   | x |   | x | 3 |
|                              | 1 | The bench one leg lift and hold              |   | x |   |   |   |   |   | x |   | 2 |
|                              | 1 | Sideways bench with leg lift                 |   |   |   | x |   |   |   | x |   | 2 |
|                              | 1 | Hamstring advanced                           |   | x |   |   |   |   |   | x |   | 2 |
|                              | 1 | Single leg stance test your partner          | x | x | x |   |   |   | x |   | x | 4 |
|                              | 1 | Squats one leg squats                        |   | x |   |   |   |   | x |   |   | 2 |
|                              | 1 | Jumping box jump                             | x | x | x |   |   | x |   |   | x | 4 |
|                              | 1 | Running across the pitch                     |   | x |   |   |   |   | x |   | x | 3 |
|                              | 1 | Running bounding                             |   | x |   |   |   |   | x |   | x | 3 |
|                              | 1 | Running plant and cut*                       | x | x | x |   |   |   | x |   | x | 4 |
| 27                           |   |                                              |   |   |   |   |   |   |   |   |   |   |
| DiStefano                    | 1 | Adductor stretch                             |   |   |   | x |   |   |   | x |   | 2 |
| 2009                         | 1 | Side bridge hip raise                        |   |   |   | x |   |   |   | x |   | 2 |
| <i>Root 2015</i>             | 1 | Calf stretch                                 |   | x |   |   |   |   | x |   |   | 2 |
|                              | 1 | Heel raise with internal rotation            | x | x |   | x | x |   |   |   |   | 3 |
|                              | 1 | Diagonal ball reach                          | x | x |   | x | x |   |   |   | x | 4 |
|                              | 1 | Side step tubing                             |   |   |   | x |   | x |   |   |   | 2 |
|                              | 1 | Hip bridge                                   |   | x |   |   |   |   |   | x |   | 2 |
|                              | 1 | Multiplanar Lunges (135 degrees)             | x | x |   | x | x |   |   |   |   | 3 |
|                              | 1 | Multiplanar lunges                           | x | x | x |   | x |   |   |   |   | 3 |

|           |   |                                           |   |   |   |   |   |   |   |   |   |
|-----------|---|-------------------------------------------|---|---|---|---|---|---|---|---|---|
|           | 1 | Multiplanar hops to balance               | x | x | x |   |   | x |   | x | 4 |
|           | 1 | Multiplanar hops to balance (135 degrees) | x | x |   | x |   | x |   | x | 4 |
|           | 1 | Single legged squat                       |   | x |   |   |   | x |   |   | 2 |
|           | 1 | Forward line hops                         |   | x |   |   | x |   |   | x | 3 |
|           | 1 | Sideways line hops                        |   |   | x |   | x |   |   | x | 3 |
|           | 1 | Squat jumps                               |   | x |   |   | x |   |   | x | 3 |
|           | 1 | Walking lunge                             |   | x |   |   | x |   |   |   | 2 |
|           | 1 | Vertical jump with header                 |   | x |   |   | x |   | x | x | 4 |
|           | 1 | Single leg balance toss                   |   |   | x |   |   | x | x |   | 3 |
|           | 1 | Sideways shuffle                          |   |   | x |   |   | x |   |   | 2 |
|           | 1 | Hamstring stretch                         |   | x |   |   |   |   | x |   | 2 |
|           | 1 | Quadriceps stretch                        |   | x |   |   |   |   | x |   | 2 |
|           | 1 | Hip flexor stretch                        |   | x |   |   |   |   | x |   | 2 |
| 22        |   |                                           |   |   |   |   |   |   |   |   |   |
|           |   |                                           |   |   |   |   |   |   |   |   |   |
| DiStefano | 1 | Forward lunge                             |   | x |   |   | x |   |   |   | 2 |
| 2011      | 1 | Broad jump                                |   | x |   |   | x |   |   | x | 3 |
|           | 1 | Single leg squat                          |   | x |   |   |   | x |   |   | 2 |
|           | 1 | Hip bridge                                |   | x |   |   |   |   | x |   | 2 |
|           | 1 | Calf stretch                              |   | x |   |   |   | x |   |   | 2 |
|           | 1 | Hip Flexor stretch                        |   | x |   |   |   |   | x |   | 2 |
|           | 1 | Adductor stretch                          |   |   | x |   |   |   | x |   | 2 |
|           | 1 | Squat jumps                               |   | x |   |   | x |   |   | x | 3 |
|           | 1 | Double leg forward hops                   |   | x |   |   | x |   |   | x | 3 |
|           | 1 | Single leg forward hops                   |   | x |   |   |   | x |   | x | 3 |
|           | 1 | Double leg sideways hops                  |   |   | x |   | x |   |   | x | 3 |
|           | 1 | Single leg sideways hops                  |   |   | x |   |   | x |   | x | 3 |
|           | 1 | 180 deg. jump to balance                  | x | x |   | x | x |   |   | x | 4 |
|           | 1 | Single leg forward hop to balance         | x | x | x |   |   | x | x | x | 5 |
|           | 1 | Single leg ball toss                      |   |   | x |   |   | x | x |   | 3 |
|           | 1 | Toe-heel walk                             |   | x |   |   |   | x |   |   | 2 |
|           | 1 | High knee run                             |   | x |   |   |   | x |   | x | 3 |
|           | 1 | Sideways shuffle                          |   |   | x |   | x |   |   | x | 3 |
|           | 1 | Z cuts                                    | x | x |   | x |   | x |   | x | 4 |
|           | 1 | Double leg squat                          |   | x |   |   | x |   |   |   | 2 |
|           | 1 | Toe walk                                  |   | x |   |   | x |   |   |   | 2 |
|           | 1 | Double leg heel raise                     |   | x |   |   | x |   |   |   | 2 |
|           | 1 | Straight leg march                        |   | x |   |   |   | x |   |   | 2 |
|           | 1 | Hand walk                                 |   | x |   |   | x |   | x |   | 3 |



|       |   |                                           |   |   |   |   |   |   |   |   |   |   |   |
|-------|---|-------------------------------------------|---|---|---|---|---|---|---|---|---|---|---|
|       | 1 | Squat jump                                |   |   | X |   |   | X |   |   | X | 3 |   |
|       | 1 | Side plank                                |   |   |   | X |   |   |   | X |   | 2 |   |
|       | 1 | Push up                                   |   |   | X |   |   |   |   | X |   | 2 |   |
|       | 1 | Single leg reach                          |   |   | X |   |   |   | X |   | X | 3 |   |
|       | 1 | Side hop to balance                       |   |   |   | X |   |   | X |   |   | X | 3 |
|       | 1 | Ice skater                                |   |   |   | X |   |   | X |   |   | X | 3 |
|       | 1 | L hop                                     | X | X |   |   | X |   | X |   |   | X | 4 |
| 17    |   |                                           |   |   |   |   |   |   |   |   |   |   |   |
|       |   |                                           |   |   |   |   |   |   |   |   |   |   |   |
| Finch | 1 | Squares                                   | X | X | X |   |   |   | X |   |   | X | 4 |
| 2014  | 1 | Weaving bounds (a)                        | X | X | X |   |   |   | X |   |   | X | 4 |
|       | 1 | Weaving bounds (b)                        | X | X | X |   |   |   | X |   |   | X | 4 |
|       | 1 | Weaving hops                              | X | X | X |   |   |   | X |   |   | X | 4 |
|       | 1 | Dura-disc balance bilateral stance        |   |   |   | X |   | X |   |   |   |   | 2 |
|       | 1 | Wobble board balance                      | X | X | X |   |   |   | X |   | X |   | 4 |
|       | 1 | Balance hand passing                      | X | X | X |   |   |   | X |   | X |   | 4 |
|       | 1 | Balance kicking                           | X | X | X |   |   |   | X |   | X |   | 4 |
|       | 1 | Dura-disc hop                             | X | X | X |   |   |   | X |   | X | X | 5 |
|       | 1 | Hurdle jumps                              |   |   | X |   |   | X |   |   |   | X | 3 |
|       | 1 | Lateral hurdle jumps                      |   |   |   | X |   |   | X |   |   | X | 3 |
|       | 1 | Hurdle jump (PP step)                     | X | X | X |   |   |   | X |   |   | X | 4 |
|       | 1 | Hurdle jump (UP step)                     | X | X | X |   |   |   | X |   |   | X | 4 |
|       | 1 | Hurdle hop                                |   |   | X |   |   |   | X |   |   | X | 3 |
|       | 1 | Pre-planned change of direction           | X | X | X |   |   |   | X |   |   | X | 4 |
|       | 1 | Un-planned change of direction            | X | X | X |   |   |   | X |   |   | X | 4 |
|       | 1 | Un-planned change of direction (180 turn) | X | X |   |   | X |   | X |   |   | X | 4 |
|       | 1 | Swiss ball kneeling                       |   |   | X |   |   |   |   |   | X |   | 2 |
|       | 1 | Swiss ball squat                          |   |   | X |   |   | X |   |   |   |   | 2 |
|       | 1 | Mini-tramp landing                        |   |   | X |   |   | X |   |   |   | X | 3 |
|       | 1 | Mini-tramp landing lateral hop            | X | X | X |   |   | X |   |   |   | X | 4 |
|       | 1 | Mini-tramp landing hop and step           | X | X | X |   |   |   | X |   |   | X | 4 |
|       | 1 | Mini tramp landing catch and step         | X | X | X |   |   |   | X |   | X | X | 5 |
|       | 1 | Shuttle runs                              | X | X |   |   | X |   | X |   |   | X | 4 |
|       | 1 | Bunny jumps                               |   |   | X |   |   | X |   |   |   | X | 3 |
|       | 1 | Standing triples                          |   |   | X |   |   |   | X |   |   | X | 3 |
|       | 1 | Sprints (Iying start)                     |   |   | X |   |   |   | X |   |   | X | 3 |
|       | 1 | Resisted sprints                          |   |   | X |   |   |   | X |   |   | X | 3 |
|       | 1 | Tempo runs* Forward                       |   |   | X |   |   |   | X |   |   | X | 3 |
|       | 1 | Tempo runs* Side                          |   |   |   | X |   |   | X |   |   | X | 3 |

|               |   |                                                                          |   |   |   |   |  |   |  |   |   |   |
|---------------|---|--------------------------------------------------------------------------|---|---|---|---|--|---|--|---|---|---|
|               | 1 | Kneeling beach sprints*                                                  |   |   |   |   |  | X |  |   | X | 3 |
|               | 1 | Graduated sprints                                                        |   |   |   |   |  | X |  |   | X | 3 |
|               | 1 | Stoppies                                                                 |   |   |   |   |  | X |  |   | X | 3 |
|               | 1 | Pre-planned change of direction - double forward                         | X | X | X |   |  | X |  |   | X | 4 |
|               | 1 | Backpedals (a)                                                           |   |   |   |   |  | X |  |   | X | 3 |
|               | 1 | Backpedals (b)                                                           | X | X | X |   |  | X |  |   | X | 4 |
|               | 1 | T-test                                                                   | X | X | X | X |  | X |  |   | X | 5 |
| 37            |   |                                                                          |   |   |   |   |  |   |  |   |   |   |
|               |   |                                                                          |   |   |   |   |  |   |  |   |   |   |
| Fox           | 1 | Standing on both feet; jump and land                                     |   |   |   |   |  | X |  |   | X | 3 |
| 2018          | 1 | 2 feet jump; 1 foot landing                                              |   |   |   |   |  | X |  |   | X | 3 |
|               | 1 | Stationary forward lunge                                                 |   |   |   |   |  | X |  |   |   | 2 |
|               | 1 | 2 feet jump and land (N,S, E, W) 1/4 turn jumps                          | X | X |   | X |  | X |  |   | X | 4 |
|               | 1 | 2 feet jump and land with ball                                           |   |   |   |   |  | X |  |   | X | 3 |
|               | 1 | 2 feet jump and 1 foot land with ball                                    |   |   |   |   |  | X |  |   | X | 3 |
|               | 1 | Run up and land while catching a ball in the air                         |   |   |   |   |  | X |  | X | X | 4 |
|               | 1 | 2 feet jump and 2 feet land with rotation                                | X | X |   | X |  | X |  |   | X | 4 |
|               | 1 | Walking forward lunges                                                   |   |   |   |   |  | X |  |   |   | 2 |
|               | 1 | 2 feet jump 1 foot land with rotation                                    | X | X |   | X |  | X |  |   | X | 4 |
|               | 1 | 2 feet jump and land with ball (N,S, E, W) 1/4 turn jumps                | X | X |   | X |  | X |  |   | X | 4 |
|               | 1 | Hop (N, S, E, W)                                                         | X | X | X |   |  | X |  |   | X | 4 |
|               | 1 | Run up, land, pivot pass behind to known player                          | X | X |   | X |  | X |  | X | X | 5 |
|               | 1 | Step lunge forward                                                       |   |   |   |   |  | X |  |   |   | 2 |
|               | 1 | Quick feet and lunge forward                                             |   |   |   |   |  | X |  |   |   | 2 |
|               | 1 | Step lunge forward with ball                                             |   |   |   |   |  | X |  |   |   | 2 |
|               | 1 | Quick feet and lunge forward with ball                                   |   |   |   |   |  | X |  |   | X | 3 |
|               | 1 | Run up, land, pivot pass behind to Unknown player                        | X | X |   | X |  | X |  | X | X | 5 |
|               | 1 | Quick feet and side step                                                 | X | X | X |   |  | X |  |   |   | 3 |
|               | 1 | Quick feet and side step with ball                                       | X | X | X |   |  | X |  |   |   | 3 |
|               | 1 | Break from a defender, run up, land, pivot pass behind to known player   | X | X |   | X |  | X |  | X | X | 5 |
|               | 1 | Jump, lunge, land                                                        |   |   |   |   |  | X |  |   | X | 3 |
|               | 1 | Jump, lunge, land with ball                                              |   |   |   |   |  | X |  |   | X | 3 |
|               | 1 | Break from a defender, run up, land, pivot pass behind to UNknown player | X | X |   | X |  | X |  | X | X | 5 |
|               | 1 | Moving jump lunge/land                                                   |   |   |   |   |  | X |  |   | X | 3 |
| 25            |   |                                                                          |   |   |   |   |  |   |  |   |   |   |
|               |   |                                                                          |   |   |   |   |  |   |  |   |   |   |
| Hagglund      | 1 | One legged knee squat: hands on hips                                     |   |   |   |   |  | X |  |   |   | 2 |
| 2009          | 1 | One legged knee squat holding ball overhead                              |   |   |   |   |  | X |  | X |   | 3 |
| Lindblom 2019 | 1 | Single leg bend overs while holding ball, touch the ground on diagonal   | X | X |   | X |  | X |  | X |   | 4 |







|         |   |                                    |   |   |   |   |   |   |   |   |   |
|---------|---|------------------------------------|---|---|---|---|---|---|---|---|---|
|         | 1 | Jump in place, rotating 180 deg    | x | x |   | x | x |   |   | x | 4 |
|         | 1 | Squat jumps                        |   | x |   |   | x |   |   | x | 3 |
|         | 1 | Broad jumps                        |   | x |   |   | x |   |   | x | 3 |
|         | 1 | Jump over 3in cones front to back  |   | x |   |   | x |   |   | x | 3 |
|         | 1 | Jump over 3in cones side to side   |   |   | x |   | x |   |   | x | 3 |
|         | 1 | Bounding in place                  |   | x |   |   | x |   |   | x | 3 |
|         | 1 | Scissors jumps                     |   | x |   |   | x |   |   | x | 3 |
|         | 1 | Side to side bounding              |   |   | x |   | x |   |   | x | 3 |
|         | 1 | Single leg hop, hop, stick landing |   | x |   |   |   | x |   | x | 3 |
|         | 1 | Jump, jump, jump, vertical jump    |   | x |   |   |   | x |   | x | 3 |
|         | 1 | Single leg jump for distance       |   | x |   |   |   | x |   | x | 3 |
|         | 1 | Jump into bounding                 |   | x |   |   | x |   |   | x | 3 |
|         | 1 | Diagonal bounding                  | x | x | x |   | x |   |   | x | 4 |
|         | 1 | Shuttle run                        | x | x |   | x |   | x |   | x | 4 |
|         | 1 | Diagonal run                       | x | x | x |   |   | x |   | x | 4 |
|         | 1 | Lateral shuffle                    |   |   | x |   |   | x |   | x | 3 |
| 48      |   |                                    |   |   |   |   |   |   |   |   |   |
|         |   |                                    |   |   |   |   |   |   |   |   |   |
| Lephart | 1 | Quadriceps stretch                 |   | x |   |   |   |   | x |   | 2 |
| 2005    | 1 | Hamstrings stretch                 |   | x |   |   |   |   | x |   | 2 |
|         | 1 | Hip flexor stretch                 |   | x |   |   |   |   | x |   | 2 |
|         | 1 | TFL stretch                        |   |   | x |   | x |   |   |   | 2 |
|         | 1 | Hip adductor stretch               |   |   | x |   |   |   | x |   | 2 |
|         | 1 | Calf stretch                       |   | x |   |   | x |   |   |   | 2 |
|         | 1 | Single leg balance                 |   |   | x |   |   | x |   |   | 2 |
|         | 1 | Single leg balance- flex knee      | x | x | x |   |   | x |   |   | 3 |
|         | 1 | Single leg balance- perturbations* | x | x | x |   |   | x |   | x | 4 |
|         | 1 | Lateral step downs                 |   |   | x |   |   | x |   |   | 2 |
|         | 1 | Theraband leg curls                |   | x |   |   |   |   | x |   | 2 |
|         | 1 | Theraband leg extensions           |   | x |   |   |   |   | x |   | 2 |
|         | 1 | Theraband squats                   |   | x |   |   | x |   |   |   | 2 |
|         | 1 | Abdominal curl ups                 |   | x |   |   |   |   | x |   | 2 |
|         | 1 | Side bridging, bent knees          |   |   | x |   |   |   | x |   | 2 |
|         | 1 | Forward lunges                     |   | x |   |   | x |   |   |   | 2 |
|         | 1 | Lateral lunges                     |   |   | x |   | x |   |   |   | 2 |
|         | 1 | Single leg hip hike                |   |   | x |   |   | x |   |   | 2 |
|         | 1 | Standing hip rotations*            |   |   |   | x |   | x |   | x | 3 |
|         | 1 | Single leg forward hops            |   | x |   |   |   | x |   | x | 3 |
|         | 1 | Double leg forward hops            |   | x |   |   | x |   |   | x | 3 |







|         |   |                                                          |   |   |   |   |  |   |   |   |   |   |   |   |
|---------|---|----------------------------------------------------------|---|---|---|---|--|---|---|---|---|---|---|---|
|         | 1 | Crossover step- ski stop maximum vertical*               |   |   |   | X |  |   |   | X |   |   | X | 3 |
| Table 2 | 1 | BOSU (round) double crunch                               |   |   |   | X |  |   |   |   |   | X |   | 2 |
|         | 1 | BOSU (round) opposite swivel crunch, feet up             |   |   |   | X |  |   |   |   |   | X |   | 2 |
|         | 1 | Swiss ball reverse back hyperextensions                  |   |   |   | X |  |   |   |   |   | X |   | 2 |
|         | 1 | Deep hold position*                                      |   |   |   | X |  |   |   |   |   | X |   | 2 |
|         | 1 | Box butt touch                                           |   |   |   | X |  |   |   | X |   |   |   | 2 |
|         | 1 | Line jump, forward - deep hold                           |   |   |   | X |  |   |   | X |   |   | X | 3 |
|         | 1 | Line jump, lateral - deep hold                           |   |   | X |   |  |   | X |   |   |   | X | 3 |
|         | 1 | Box drop - deep hold                                     |   |   |   | X |  |   |   | X |   |   | X | 3 |
|         | 1 | Single leg squat - deep hold                             |   |   |   | X |  |   |   | X |   |   |   | 2 |
|         | 1 | BOSU (flat) deep hold                                    | X | X | X |   |  |   | X |   |   |   |   | 3 |
|         | 1 | BOSU (flat) drop squats                                  | X | X | X |   |  |   | X |   |   |   | X | 4 |
|         | 1 | BOSU (round) jump, stick landing, hold                   | X | X | X |   |  |   | X |   |   | X | X | 5 |
|         | 1 | BOSU (round) both knees - hold                           | X | X | X |   |  |   |   |   | X |   |   | 3 |
|         | 1 | BOSU (round) crunches                                    |   |   |   | X |  |   |   |   |   | X |   | 2 |
|         | 1 | BOSU (round) swivel crunch, feet planted                 |   |   |   | X |  |   |   |   |   | X |   | 2 |
|         | 1 | BOSU (round) single leg pelvic bridges                   |   |   |   | X |  |   |   |   |   | X |   | 2 |
|         | 1 | BOSU (round) supermans                                   |   |   |   | X |  |   |   |   |   | X |   | 2 |
|         | 1 | BOSU (flat) drop stick - deep hold                       | X | X | X |   |  |   | X |   |   |   | X | 4 |
|         | 1 | BOSU (flat) deep hold partner perturbations              | X | X | X |   |  |   | X |   |   | X |   | 4 |
|         | 1 | Box drop, lateral - deep hold                            |   |   |   |   |  | X |   |   |   |   | X | 3 |
|         | 1 | Single legged line hop, front/back- deep hold            |   |   |   | X |  |   |   | X |   |   | X | 3 |
|         | 1 | Single legged squat - heel touches*                      |   |   |   | X |  |   |   | X |   |   |   | 2 |
|         | 1 | Swiss ball, both knees - deep hold                       |   |   |   | X |  |   | X |   |   |   |   | 2 |
|         | 1 | BOSU (round) single legged step - stick deep hold        | X | X | X |   |  |   |   | X |   | X |   | 4 |
|         | 1 | Double crunch                                            |   |   |   | X |  |   |   |   |   | X |   | 2 |
|         | 1 | Table double crunch                                      |   |   |   | X |  |   |   |   |   | X |   | 2 |
|         | 1 | Table double swivel crunch                               |   |   |   | X |  |   |   |   |   | X |   | 2 |
|         | 1 | Table reverse hyperextensions                            |   |   |   | X |  |   |   |   |   | X |   | 2 |
|         | 1 | BOSU (round) lateral crunch                              |   |   |   | X |  |   |   |   |   | X |   | 2 |
|         | 1 | BOSU (round) swimmers                                    |   |   |   | X |  |   |   |   |   | X |   | 2 |
|         | 1 | Double BOSU (flat) deep hold - partner perturbations     | X | X | X |   |  |   | X |   |   | X |   | 4 |
|         | 1 | BOSU (flat) drop single legged airex stick - deep hold   | X | X | X |   |  |   |   | X |   | X | X | 5 |
|         | 1 | BOSU (round) single legged deep partner ball toss        | X | X | X |   |  |   |   | X |   | X |   | 4 |
|         | 1 | Swiss ball, both knees, deep hold partner perturbations  |   |   |   | X |  |   |   |   |   | X |   | 2 |
|         | 1 | BOSU (round) single legged (4 way) hop stick - deep hold | X | X | X |   |  |   |   | X |   | X | X | 5 |
|         | 1 | BOSU (flat) single legged ball pick up                   | X | X | X |   |  |   |   | X |   | X |   | 4 |
|         | 1 | Airex walking lunges                                     |   |   |   | X |  |   | X |   |   |   |   | 2 |
|         | 1 | BOSU (flat) single legged squats                         | X | X | X |   |  |   |   | X |   | X |   | 4 |

|            |   |                                                            |   |   |   |   |   |   |   |   |   |
|------------|---|------------------------------------------------------------|---|---|---|---|---|---|---|---|---|
|            | 1 | BOSU (flat) single legged deep hold, partner perturbations | x | x | x |   | x |   | x |   | 4 |
|            | 1 | Straight leg lifts with toe punch                          |   | x |   |   |   | x |   |   | 2 |
|            | 1 | Straight leg lateral double crunch                         |   |   | x |   |   | x |   |   | 2 |
| Table 3    | 1 | Dumbbell hang snatch                                       |   | x |   | x |   |   |   |   | 2 |
|            | 1 | Bench butt touch                                           |   | x |   | x |   |   |   |   | 2 |
|            | 1 | Barbell squat                                              |   | x |   | x |   |   |   |   | 2 |
|            | 1 | Bench press                                                |   | x |   |   |   | x |   |   | 2 |
|            | 1 | Lying leg curl                                             |   | x |   |   |   | x |   |   | 2 |
|            | 1 | Lateral pull downs                                         |   |   | x |   |   | x |   |   | 2 |
|            | 1 | Ball squat dumbbell floor touches                          |   | x |   | x |   |   | x |   | 3 |
|            | 1 | Dumbbell shoulder press                                    |   |   | x |   |   | x |   |   | 2 |
|            | 1 | Russian hamstring curl                                     |   | x |   |   |   | x |   |   | 2 |
|            | 1 | Seated cable row                                           |   | x |   |   |   | x |   |   | 2 |
|            | 1 | Hip abd/add at 60 deg/sec and 120 deg/sec                  |   |   | x |   |   | x |   |   | 2 |
|            | 1 | Double crunch                                              |   | x |   |   |   | x |   |   | 2 |
|            | 1 | Hang clean                                                 |   | x |   | x |   |   |   |   | 2 |
|            | 1 | Leg press                                                  |   | x |   | x |   |   |   |   | 2 |
|            | 1 | Dumbbells incline press                                    |   | x |   |   |   | x |   |   | 2 |
|            | 1 | Front lunges + press                                       |   | x |   | x |   |   | x |   | 3 |
|            | 1 | Inverted lying pull ups                                    |   | x |   |   |   | x |   |   | 2 |
|            | 1 | Stretch dumbbell deadlift*                                 |   | x |   | x |   |   | x |   | 3 |
|            | 1 | 3-way dumbbell shoulder circuit                            |   | x |   |   |   | x |   |   | 2 |
|            | 1 | Bench reverse hyperextensions                              |   | x |   |   |   | x |   |   | 2 |
|            | 1 | Knee flex/ext at 120 deg/sec and 300 deg/sec               |   | x |   |   |   | x |   |   | 2 |
|            | 1 | Band good mornings                                         |   | x |   | x |   |   | x |   | 3 |
|            | 1 | Back extensions                                            |   | x |   |   |   | x |   |   | 2 |
|            | 1 | Ankle circuit*                                             |   | x |   |   |   | x |   |   | 2 |
|            | 1 | Single leg band assisted squat*                            |   | x |   | x |   |   |   |   | 2 |
|            | 1 | Band shoulder press*                                       |   | x |   |   |   | x |   |   | 2 |
|            | 1 | Standing cable row                                         |   | x |   | x |   |   |   |   | 2 |
| 104        |   |                                                            |   |   |   |   |   |   |   |   |   |
|            |   |                                                            |   |   |   |   |   |   |   |   |   |
| Myer (CSM) | 1 | Lateral jump and hold                                      |   |   | x | x |   |   |   | x | 3 |
| 2008       | 1 | Lateral jumps                                              |   |   | x | x |   |   |   | x | 3 |
| Sabet 2019 | 1 | Lateral hop and hold*                                      |   |   | x |   | x |   |   | x | 3 |
|            | 1 | Lateral hops*                                              |   |   | x |   | x |   |   | x | 3 |
|            | 1 | Hops*                                                      |   | x |   |   | x |   |   | x | 3 |
|            | 1 | Single tuck jump soft landings                             |   | x |   | x |   |   |   | x | 3 |
|            | 1 | Double tuck jumps                                          |   | x |   | x |   |   |   | x | 3 |







|       |   |                                                                 |   |   |   |   |   |   |   |   |   |
|-------|---|-----------------------------------------------------------------|---|---|---|---|---|---|---|---|---|
|       | 1 | Jump to a mat catching a ball, then a 180 deg turn on the mat   | x | x |   | x | x |   | x | x | 5 |
|       | 1 | 2 legged wobble board ball tosses                               |   | x |   |   | x |   |   | x | 3 |
|       | 1 | 2 legged wobble board squats                                    |   | x |   |   | x |   |   |   | 2 |
|       | 1 | Single legged wobble board squats                               |   | x |   |   |   | x |   | x | 3 |
|       | 1 | Single leg balance on wobble board with ball tosses             |   |   | x |   |   | x |   | x | 3 |
|       | 1 | Single leg wobble board with bounding the ball with eyes closed |   |   | x |   |   | x |   | x | 3 |
|       | 1 | Double leg wobble board balance with partner pushes             |   | x |   |   | x |   |   | x | 3 |
|       | 1 | Single leg wobble board balance with partner pushes             |   |   | x |   |   | x |   | x | 3 |
| 20    |   |                                                                 |   |   |   |   |   |   |   |   |   |
| Noyes | 1 | Wall jumps                                                      |   | x |   |   | x |   |   |   | 3 |
| 2013  | 1 | Tuck jumps                                                      |   | x |   |   | x |   |   |   | 3 |
|       | 1 | Squat jumps                                                     |   | x |   |   | x |   |   |   | 3 |
|       | 1 | Barrier jumps side to side                                      |   |   | x |   | x |   |   |   | 3 |
|       | 1 | Barrier jumps forward and backward                              |   | x |   |   | x |   |   |   | 3 |
|       | 1 | 180 deg jumps                                                   | x | x |   | x | x |   |   |   | 4 |
|       | 1 | Broad jumps                                                     |   | x |   |   | x |   |   |   | 3 |
|       | 1 | Bounding in place                                               |   | x |   |   | x |   |   |   | 3 |
|       | 1 | Triple broad jump into vertical jump                            |   | x |   |   | x |   |   |   | 3 |
|       | 1 | Single leg hops                                                 |   | x |   |   |   | x |   |   | 3 |
|       | 1 | Scissor jumps                                                   |   | x |   |   | x |   |   |   | 3 |
|       | 1 | Bounding for distance                                           |   | x |   |   | x |   |   |   | 3 |
|       | 1 | Step, jump up and down, vertical                                |   | x |   |   | x |   |   |   | 3 |
|       | 1 | Mattress jumps*                                                 |   | x |   |   | x |   |   |   | 3 |
|       | 1 | Triple single leg hop - stick landing                           |   | x |   |   |   | x |   |   | 3 |
|       | 1 | Jump into bounding                                              |   | x |   |   | x |   |   |   | 3 |
|       | 1 | Serpentine run                                                  | x | x | x |   |   | x |   |   | 4 |
|       | 1 | Modified shuttle*                                               | x | x |   | x |   | x |   |   | 4 |
|       | 1 | Square drill*                                                   | x | x | x |   | x |   |   |   | 4 |
|       | 1 | Nebraska drill*                                                 | x | x |   | x |   | x |   |   | 4 |
|       | 1 | Illinois drill*                                                 | x | x |   | x |   | x |   |   | 4 |
|       | 1 | T-drill                                                         | x | x | x | x |   | x |   |   | 5 |
|       | 1 | Partner push offs - sprint 10 yrds                              |   | x |   |   |   | x | x |   | 4 |
|       | 1 | Sprint - backpedal                                              |   | x |   |   |   | x |   |   | 3 |
|       | 1 | Acceleration with band (10, 20 and 30 yrd)                      |   | x |   |   |   | x |   |   | 3 |
|       | 1 | Sprint with ground touches backpedal                            |   | x |   |   |   | x | x |   | 4 |
|       | 1 | 1/2 field or 50 yrd runs                                        |   | x |   |   |   | x |   |   | 3 |
|       | 1 | 100 yrd shuttle                                                 | x | x |   | x |   | x |   |   | 4 |
|       | 1 | 1/4 eagle, sprint, jog back                                     | x | x |   | x |   | x |   |   | 4 |

|             |   |                                                      |   |   |   |   |   |   |   |   |   |
|-------------|---|------------------------------------------------------|---|---|---|---|---|---|---|---|---|
|             | 1 | 50 yrd shuttle                                       | x | x |   | x |   | x |   | x | 4 |
|             | 1 | Box drill, sprint 90 deg backpedal, 1/2 field        | x | x | x |   |   | x |   | x | 4 |
|             | 1 | 50 yrd cone drill*                                   |   | x |   |   |   | x |   | x | 3 |
|             | 1 | Ladder drills, up and back*                          |   | x |   |   |   | x |   | x | 3 |
|             | 1 | Ladders, toe touches, dot drills*                    |   | x |   |   |   | x |   | x | 3 |
|             | 1 | Split leg jumps                                      |   | x |   | x |   |   |   | x | 3 |
|             | 1 | 180 deg split leg jumps                              | x | x |   | x |   |   |   | x | 4 |
| 36          |   |                                                      |   |   |   |   |   |   |   |   |   |
|             |   |                                                      |   |   |   |   |   |   |   |   |   |
| Olsen       | 1 | Jogging end to end                                   |   | x |   |   |   | x |   | x | 3 |
| 2005        | 1 | Backward running with sidesteps                      | x | x | x |   |   | x |   | x | 4 |
| Walden 2005 | 1 | Forward running with knee lifts and heel kicks       |   | x |   |   |   | x |   | x | 3 |
|             | 1 | Sideways running with crossovers (carioca)           | x |   | x | x |   | x |   | x | 4 |
|             | 1 | Sideways running with arms lifted (parade)           | x |   | x | x |   | x |   | x | 4 |
|             | 1 | Forward running with trunk rotations                 | x | x |   | x |   | x |   | x | 5 |
|             | 1 | Forward running with intermittent stops              |   | x |   |   |   | x |   | x | 3 |
|             | 1 | Speed runs                                           |   | x |   |   |   | x |   | x | 3 |
|             | 1 | Planting and cutting movements*                      | x | x | x |   |   | x |   | x | 4 |
|             | 1 | Jump shot landings*                                  | x | x | x |   | x |   | x | x | 5 |
|             | 1 | 2 leg balance on wobble board passing the ball       |   | x |   |   | x |   | x |   | 3 |
|             | 1 | 2 leg squats on wobble board                         |   | x |   |   | x |   |   |   | 2 |
|             | 1 | 1 leg squats on wobble board                         |   | x |   |   |   | x |   | x | 3 |
|             | 1 | 1 leg on wobble board passing the ball               |   |   | x |   |   | x |   | x | 3 |
|             | 1 | 2 legs on wobble board bouncing the ball eyes closed |   | x |   |   | x |   | x |   | 3 |
|             | 1 | 2 legs on wobble board partner perturbations         |   | x |   |   | x |   | x |   | 3 |
|             | 1 | Squats to 80 deg of knee flexion                     |   | x |   |   | x |   |   |   | 2 |
|             | 1 | Bounding strides                                     |   | x |   |   |   | x |   | x | 3 |
|             | 1 | Forward jumps                                        |   | x |   |   | x |   |   | x | 3 |
|             | 1 | Jump shot- 2 leg landings                            | x | x | x |   | x |   | x | x | 5 |
|             | 1 | Nordic hamstring lowers                              |   | x |   |   |   |   | x |   | 2 |
| 21          |   |                                                      |   |   |   |   |   |   |   |   |   |
|             |   |                                                      |   |   |   |   |   |   |   |   |   |
| Omi         | 1 | Rebound jump (ball catch)                            |   | x |   |   | x |   | x | x | 4 |
| 2018        | 1 | 180 deg turn                                         | x | x |   | x |   |   |   | x | 4 |
|             | 1 | 2 legged front back jumps                            |   | x |   |   | x |   |   | x | 3 |
|             | 1 | 2 legged side to side jumps                          |   |   | x |   | x |   |   | x | 3 |
|             | 1 | Single leg squat                                     |   | x |   |   |   | x |   |   | 2 |
|             | 1 | Side bridge                                          |   |   | x |   |   |   | x |   | 2 |
|             | 1 | Hip lift both legs                                   |   | x |   |   |   |   | x |   | 2 |



|         |   |                                             |   |   |   |   |   |   |  |   |   |   |   |   |
|---------|---|---------------------------------------------|---|---|---|---|---|---|--|---|---|---|---|---|
|         |   |                                             |   |   |   |   |   |   |  |   |   |   |   |   |
| Pasanen | 1 | Jogging                                     |   |   | x |   |   |   |  | x |   | x | 3 |   |
| 2008    | 1 | Carioca running                             | x |   |   | x | x |   |  | x |   |   | x | 4 |
|         | 1 | Sideways gallop                             |   |   |   | x |   |   |  | x |   |   | x | 3 |
|         | 1 | Zigzag running forward                      | x | x | x |   |   |   |  | x |   |   | x | 4 |
|         | 1 | Zigzag running backward                     | x | x | x |   |   |   |  | x |   |   | x | 4 |
|         | 1 | Skipping                                    |   |   | x |   |   |   |  | x |   |   | x | 3 |
|         | 1 | Walking lunges                              |   |   | x |   |   | x |  |   |   |   |   | 2 |
|         | 1 | Slow alternate bounding                     |   |   | x |   |   |   |  | x |   |   | x | 3 |
|         | 1 | Combination hops                            |   |   | x |   |   |   |  | x |   |   | x | 3 |
|         | 1 | Double leg balance with stick*              |   |   | x |   |   | x |  |   |   |   |   | 2 |
|         | 1 | Single leg balance with stick               |   |   |   | x |   |   |  | x |   | x |   | 3 |
|         | 1 | Single leg balance wih medicine ball throws |   |   |   | x |   |   |  | x |   | x |   | 3 |
|         | 1 | Double leg balance on wobble board          |   |   | x |   |   | x |  |   |   |   |   | 2 |
|         | 1 | Single leg balance on wobble board          |   |   |   | x |   |   |  | x |   | x |   | 3 |
|         | 1 | Forward jumps double leg                    |   |   | x |   |   | x |  |   |   |   | x | 3 |
|         | 1 | Forward jumps single leg                    |   |   | x |   |   |   |  | x |   |   | x | 3 |
|         | 1 | Lateral skater leaps                        |   |   |   | x |   |   |  | x |   |   | x | 3 |
|         | 1 | Split squat jumps                           |   |   | x |   |   | x |  |   |   |   | x | 3 |
|         | 1 | Cycled split squat jumps*                   |   |   | x |   |   | x |  |   |   |   | x | 3 |
|         | 1 | Double leg jump over stick                  |   |   | x |   |   | x |  |   |   |   | x | 3 |
|         | 1 | Single leg jump over stick                  |   |   | x |   |   |   |  | x |   |   | x | 3 |
|         | 1 | Double leg backward jump over stick         |   |   | x |   |   | x |  |   |   |   | x | 3 |
|         | 1 | Single leg backward jump over stick         |   |   | x |   |   |   |  | x |   |   | x | 3 |
|         | 1 | Double leg lateral jump over stick          |   |   |   | x |   | x |  |   |   |   | x | 3 |
|         | 1 | Single leg lateral jump over stick          |   |   |   | x |   |   |  | x |   |   | x | 3 |
|         | 1 | Double leg squat with partner on back       |   |   | x |   |   | x |  |   |   |   |   | 2 |
|         | 1 | Single leg split squat                      |   |   | x |   |   |   |  | x |   |   |   | 2 |
|         | 1 | Nordic hamstrings                           |   |   | x |   |   |   |  |   | x |   |   | 2 |
|         | 1 | Isometric front bridge                      |   |   | x |   |   |   |  |   | x |   |   | 2 |
|         | 1 | Isometric side bridge                       |   |   |   | x |   |   |  |   | x |   |   | 2 |
|         | 1 | Cross curl up                               |   |   | x |   |   |   |  |   | x |   |   | 2 |
|         | 1 | Seated hip and back neutral zone exercises* |   |   | x |   |   |   |  |   | x |   |   | 2 |
|         | 1 | Hamstring stretch                           |   |   | x |   |   |   |  |   | x |   |   | 2 |
|         | 1 | Kneeling hip flexor stretch                 |   |   | x |   |   |   |  |   | x |   |   | 2 |
| 34      |   |                                             |   |   |   |   |   |   |  |   |   |   |   |   |
|         |   |                                             |   |   |   |   |   |   |  |   |   |   |   |   |
| Paterno | 1 | Broad jumps, stick landing                  |   |   | x |   |   | x |  |   |   |   | x | 3 |
| 2004    | 1 | Box drops, stick landing                    |   |   | x |   |   | x |  |   |   |   | x | 3 |



|   |                                                    |   |   |   |   |   |  |   |   |   |   |   |
|---|----------------------------------------------------|---|---|---|---|---|--|---|---|---|---|---|
| 1 | Broad jump vertical                                |   |   |   | X |   |  | X |   |   | X | 3 |
| 1 | Forward barrier hops with middle box               |   |   |   | X |   |  | X |   |   | X | 3 |
| 1 | Forward hops over barriers                         |   |   |   | X |   |  | X |   |   | X | 3 |
| 1 | Lunge jump                                         |   |   |   | X |   |  | X |   |   | X | 3 |
| 1 | Tuck jump (thighs parallel)                        |   |   |   | X |   |  | X |   |   | X | 3 |
| 1 | 180 deg jumps (speed)                              | X | X |   |   | X |  | X |   |   | X | 4 |
| 1 | Backward/forward box depth, max vertical           |   |   |   | X |   |  | X |   |   | X | 3 |
| 1 | Barrier jumps front to back                        |   |   |   | X |   |  | X |   |   | X | 3 |
| 1 | Bounding for distance                              |   |   |   | X |   |  | X |   |   | X | 3 |
| 1 | Scissors jumps                                     |   |   |   | X |   |  | X |   |   | X | 3 |
| 1 | Tuck jump with butt kick                           |   |   |   | X |   |  | X |   |   | X | 3 |
| 1 | 180 deg jumps, broad jumps                         | X | X |   |   | X |  | X |   |   | X | 4 |
| 1 | Forward barrier hops with staggered box*           |   |   |   | X |   |  | X |   |   | X | 3 |
| 1 | Box depth, max vertical, reaction*                 |   |   |   | X |   |  | X |   |   | X | 3 |
| 1 | Broad jump, jump, vertical                         |   |   |   | X |   |  | X |   |   | X | 3 |
| 1 | Zigzag jumps over barriers                         | X | X | X |   |   |  | X |   |   | X | 4 |
| 1 | Broad jump, jump, jump, vertical                   |   |   |   | X |   |  | X |   |   | X | 3 |
| 1 | Hop, hop, hop, stick (right and left)              |   |   |   | X |   |  |   | X |   | X | 3 |
| 1 | Lateral barrier hops                               |   |   |   |   | X |  | X |   |   | X | 3 |
| 1 | Lateral barrier hops with staggered box*           |   |   |   |   | X |  | X |   |   | X | 3 |
| 1 | Power steps (right and left)*                      |   |   |   | X |   |  |   | X |   |   | 2 |
| 1 | Tuck jump with abdominal crunch                    |   |   |   | X |   |  | X |   |   | X | 3 |
| 1 | Barrier jumps (front to back) speed                |   |   |   | X |   |  | X |   |   | X | 3 |
| 1 | Barrier jumps (side to side) speed                 |   |   |   |   | X |  | X |   |   | X | 3 |
| 1 | BOSU 180 deg jumps stick landing                   | X | X |   |   | X |  | X |   | X | X | 5 |
| 1 | Box depth, 180 deg, box depth max vertical         | X | X |   |   | X |  | X |   |   | X | 4 |
| 1 | Jump into bounding                                 |   |   |   | X |   |  | X |   |   | X | 3 |
| 1 | 3 barrier hop, reaction (3 way)*                   |   |   |   | X |   |  | X |   |   | X | 3 |
| 1 | Barrier hops flat (front to back) right and left   |   |   |   | X |   |  | X |   |   | X | 3 |
| 1 | Barrier hops flat (side to side) right and left    |   |   |   |   | X |  | X |   |   | X | 3 |
| 1 | Box depth, broad jump                              |   |   |   | X |   |  | X |   |   | X | 3 |
| 1 | Crossover hop, hop, hop stick (width)              |   |   |   | X |   |  |   | X |   | X | 3 |
| 1 | Multidirectional barrier hops*                     | X | X | X |   |   |  | X |   |   | X | 4 |
| 1 | Crossover hop, hop, hop, stick (distance)          | X | X | X |   |   |  |   | X |   | X | 4 |
| 1 | Box depth, 180, box depth, vertical jump, reaction | X | X |   |   | X |  | X |   |   | X | 4 |
| 1 | Box depth, 180 reaction*                           | X | X |   |   | X |  | X |   |   | X | 4 |
| 1 | Broad jump, jump, jump, vertical, reaction         |   |   |   | X |   |  | X |   |   | X | 3 |
| 1 | Forward/backward hops over barrier                 |   |   |   | X |   |  | X |   |   | X | 3 |
| 1 | Squat tuck jumps                                   |   |   |   | X |   |  | X |   |   | X | 3 |



|         |   |                                                 |   |   |   |   |   |   |   |   |   |   |
|---------|---|-------------------------------------------------|---|---|---|---|---|---|---|---|---|---|
| Pfile   | 1 | Forward/backward single legged line jumps       |   |   | x |   |   |   | x |   | x | 3 |
| 2013    | 1 | Side to side single legged line jumps           |   |   |   | x |   |   | x |   | x | 3 |
|         | 1 | High skips                                      |   |   | x |   |   |   | x |   | x | 3 |
|         | 1 | Distance skips                                  |   |   | x |   |   |   | x |   | x | 3 |
|         | 1 | Broad jumps                                     |   |   | x |   |   | x |   |   | x | 3 |
|         | 1 | Tuck jumps                                      |   |   | x |   |   | x |   |   | x | 3 |
|         | 1 | Alternating single legged lateral jumps         |   |   |   | x |   |   | x |   | x | 3 |
|         | 1 | Forward single legged hop, hop, hop and stick   |   |   | x |   |   |   | x |   | x | 3 |
|         | 1 | Squat jumps                                     |   |   | x |   |   | x |   |   | x | 3 |
|         | 1 | Single legged maximal vertical jumps            |   |   | x |   |   |   | x |   | x | 3 |
|         | 1 | Single legged jump for distance                 |   |   | x |   |   |   | x |   | x | 3 |
|         | 1 | Broad jump, jump, jump vertical jump            |   |   | x |   |   | x |   |   | x | 3 |
|         | 1 | 180 deg jumps                                   | x | x |   |   | x | x |   |   | x | 4 |
|         | 1 | Single legged lateral jumps                     |   |   |   | x |   |   | x |   | x | 3 |
|         | 1 | Abdominal draw ins                              |   |   | x |   |   |   |   | x |   | 2 |
|         | 1 | Side plank knee bent                            |   |   |   | x |   |   |   | x |   | 2 |
|         | 1 | Sidelying hip abduction                         |   |   |   | x |   |   |   | x |   | 2 |
|         | 1 | Sidelying hip ER clam shells                    |   |   |   |   | x |   |   | x |   | 2 |
|         | 1 | Crunches                                        |   |   | x |   |   |   |   | x |   | 2 |
|         | 1 | Lumbar extension, hands on head                 |   |   | x |   |   |   |   | x |   | 2 |
|         | 1 | Walking lunges, hands on hips                   |   |   | x |   |   | x |   |   |   | 2 |
|         | 1 | Hamstring bridges with abdominal draw in        |   |   | x |   |   |   |   | x |   | 2 |
|         | 1 | Side plank legs extended with abdominal draw in |   |   |   | x |   |   |   | x |   | 2 |
|         | 1 | Quadruped hip extension/ER/abduction            |   |   | x |   |   |   |   | x |   | 2 |
|         | 1 | Crunches, opposite elbow to knee                |   |   | x |   |   |   |   | x |   | 2 |
|         | 1 | Lumbar extension, upper extremities straight    |   |   | x |   |   |   |   | x |   | 2 |
|         | 1 | Squats with UEs over head                       |   |   | x |   |   | x |   |   | x | 3 |
|         | 1 | Lunges with ball toss                           |   |   | x |   |   | x |   |   | x | 3 |
| 28      |   |                                                 |   |   |   |   |   |   |   |   |   |   |
|         |   |                                                 |   |   |   |   |   |   |   |   |   |   |
| Rostami | 1 | Double leg squat                                |   |   | x |   |   | x |   |   |   | 2 |
| 2018    | 1 | Walking lunges                                  |   |   | x |   |   | x |   |   |   | 2 |
|         | 1 | Single leg squat                                |   |   | x |   |   |   | x |   |   | 2 |
|         | 1 | Double leg drop jump                            |   |   | x |   |   | x |   |   | x | 3 |
|         | 1 | Single leg stance on unstable platform          |   |   |   | x |   |   | x |   | x | 3 |
|         | 1 | Side step cutting maneuver*                     | x | x | x |   |   |   | x |   | x | 4 |
|         | 1 | Single leg hop for distance                     |   |   | x |   |   |   | x |   | x | 3 |
|         | 1 | Vertical jump                                   |   |   | x |   |   | x |   |   | x | 3 |
